# Supplementary material
Source: publisher figshare collection journal article supplement (https://acs.figshare.com/ndownloader/files/3957409)
Supplement: Supplementary file 1 [file 3957409]

## Supporting Information

### Bi-axially Mechanical Tuning of 2-D Reversible and Irreversible Surface Topologies through Simultaneous and Sequential Wrinkling

Jie Yin,<sup>1\*</sup> Jose Luis Yagüe,<sup>2\*</sup> Mary C. Boyce,<sup>3,4</sup> Karen K. Gleason<sup>2</sup>

<sup>1</sup>Department of Mechanical Engineering, Temple University, Philadelphia, PA, 19122

<sup>2</sup>Department of Chemical Engineering, Massachusetts Institute of Technology, Cambridge, MA, 02139

<sup>3</sup>Department of Mechanical Engineering, Massachusetts Institute of Technology, Cambridge, MA, 02139

<sup>4</sup>Department of Mechanical Engineering, Columbia University, New York, NY, 10027

\*These authors contributed equally to the paper

Corresponding Author: K.K.Gleason (kkg@mit.edu) M.C.Boyce (mcboyce@mit.edu)

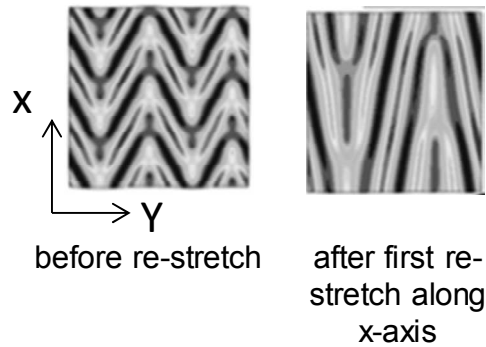

Figure S1: Simulated pattern evolution after first stretching along the x-axis with a strain of 10% followed by a strain of 25% along y-axis: Left: herringbone pattern before re-stretching; Right: intermediate branched wrinkled pattern after first stretching of 10% along x-axis. After a second re-stretch along y-axis, the wrinkles disappear and herringbone pattern returns to a flat surface

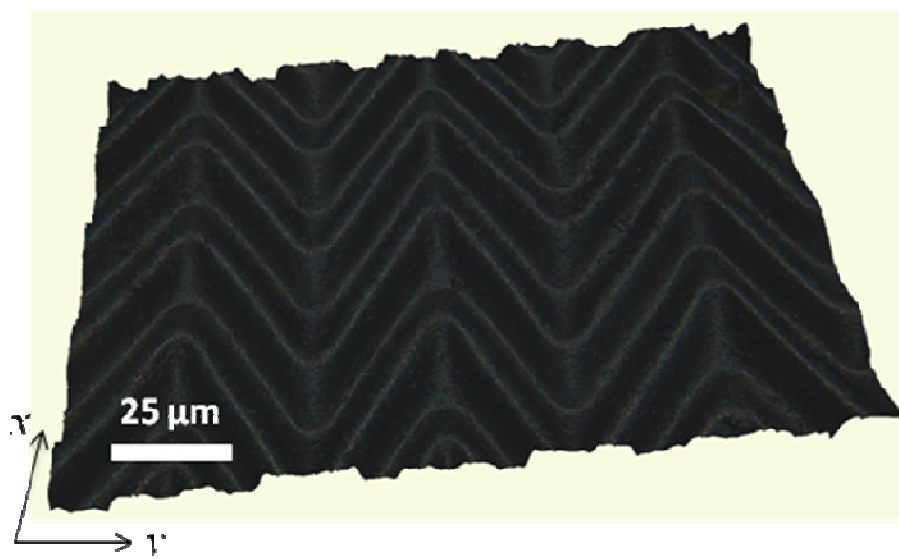

Figure S2 Wrinkling pattern obtained after stretching of 10% along  $x$ -axis and 25% along  $y$ -axis and sequential release for a second time

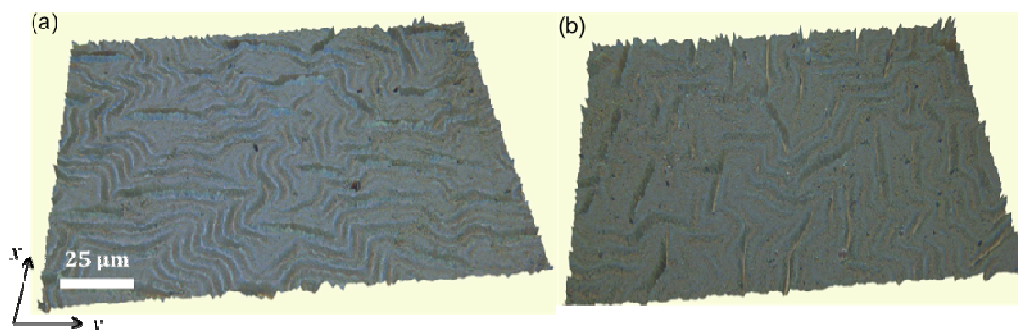

Figure S3 (a) Labyrinth pattern after sequential release of strain in the residual pattern of Figure 5d; (b) Labyrinth pattern after simultaneous release of strain in the residual pattern of Figure 5c.

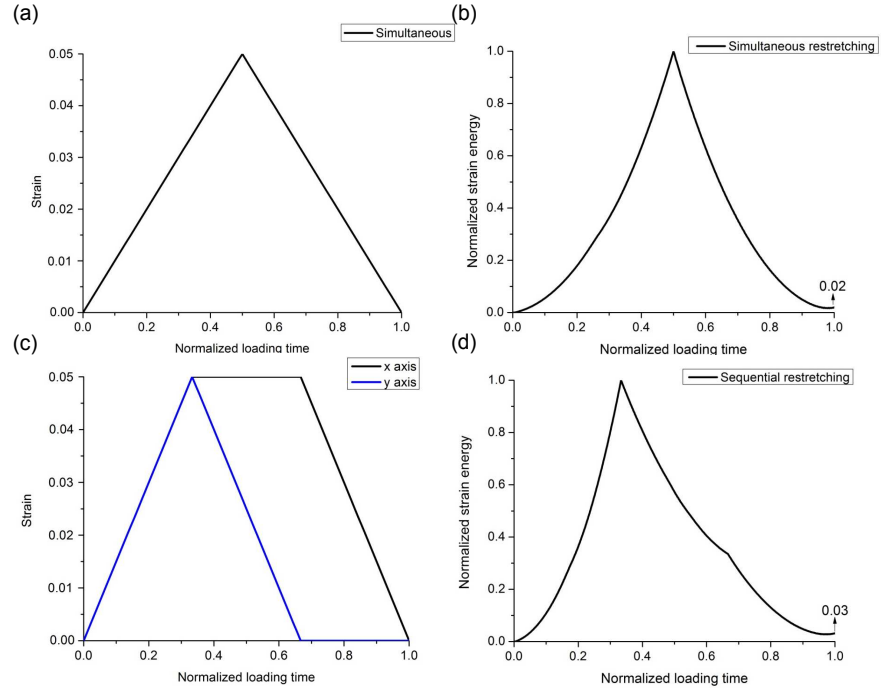

Figure S4: (a) Simultaneous loading and unloading of equi-biaxial strain of 5% with normalized loading time. (b) Corresponding normalized strain energy in the film with loading time, (c) Simultaneous loading and sequential unloading of equi-biaxial strain of 5% along x and y axis; (d) Corresponding normalized strain energy in the film with loading time

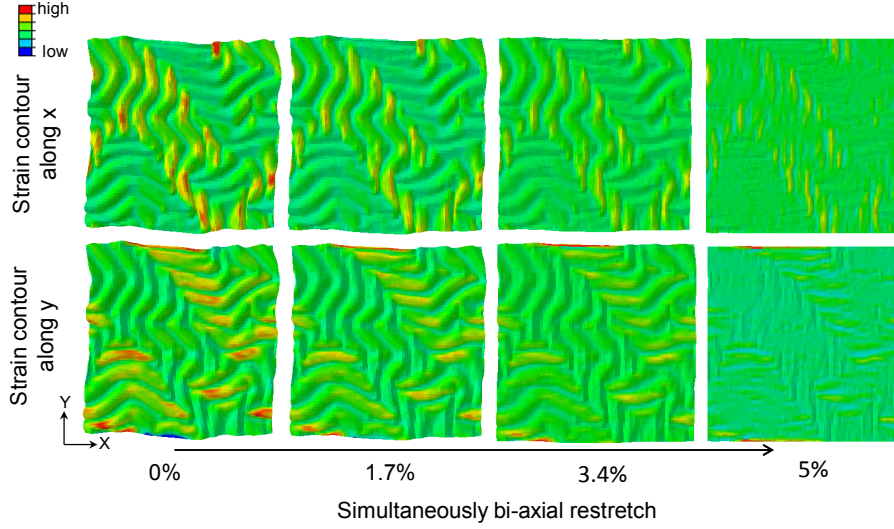

Figure S5 Simulated in-plane normal strain contours of the top layer of PDMS substrate upon simultaneously bi-axial re-stretching of labyrinth patterns to its original strain of 5%; top row: strain contours evolution along  $x$ -axis with simultaneous re-stretch strain; bottom row: strain contours evolution along  $y$ -axis with simultaneous re-stretch strain

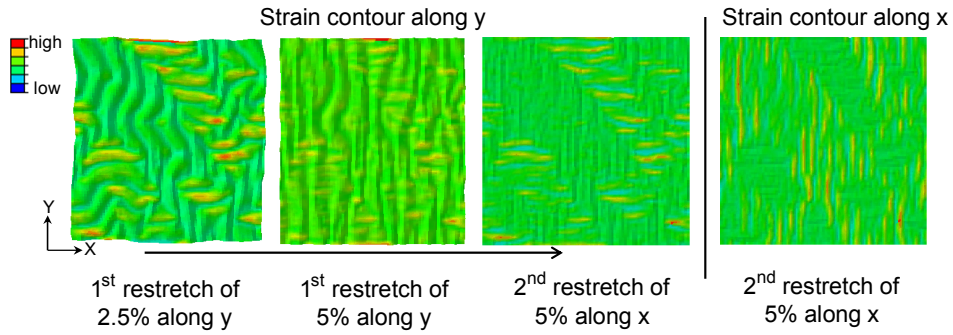

Figure S6 Simulated in-plane normal strain contours of the top layer of PDMS substrate upon sequentially re-stretching of labyrinth patterns to its original strain of 5%; left: strain contours evolution along  $y$ -axis with simultaneous re-stretch strain; right: strain contour along  $x$ -axis after second re-stretch of 5% along  $x$
